# Supplementary material for: As Safe as Possible (ASAP): A Brief App-Supported Inpatient Intervention to Prevent Postdischarge Suicidal Behavior in Hospitalized, Suicidal Adolescents
Source: Atypon-hosted journal article supplement (doi:10.1176/appi.ajp.2018.17101151), 2018-07-19
Supplement: AJP_17101151_correction01.pdf [file AJP_17101151_correction01.pdf]

**To:** Michael D. Roy  
Executive Editor, The American Journal of Psychiatry

**From:** David A. Brent, MD  
Academic Chief, Child and Adolescent Psychiatry  
Western Psychiatric Hospital  
Endowed Chair in Suicide Studies  
Professor of Psychiatry, Pediatrics, and Epidemiology  
University of Pittsburgh School of Medicine

**Date:** 6/19/2019

**Re:** Kennard, Betsy D., et al. "As Safe as Possible (ASAP): a brief app-supported inpatient intervention to prevent postdischarge suicidal behavior in hospitalized, suicidal adolescents." American Journal of Psychiatry 175.9 (2018): 864-872

---

The Suicidal Ideation Questionnaire- Jr. (Reynolds WM, Mazza JJ, 1999) consists of 15 items each scored on a seven-point scale from 0 ("I never had this thought") to 6 (Almost every day"). A total score ranging from 0 to 90 is calculated as the sum of each item. "Clinically significant" suicidal ideation is defined as a total score greater or equal to 31.

In our database, we incorrectly coded each item on a 1 to 7 scale, which inflated the total score by 15 points. Therefore, the means and the cut-point for "clinically significant" suicidal ideation we reported are incorrect. Corrections are below:

1) Page 865 – Methods

*Reported:* "significant suicidal ideation (mean=66.6 [SD=22.0]), as measured by the Suicidal Ideation Questionnaire–Junior High School Version"

*Corrected:* "significant suicidal ideation (mean=51.6 [SD=22.0]), as measured by the Suicidal Ideation Questionnaire–Junior High School Version"

2) Page 868 - Results

*Reported:* "Participants who were lost to follow-up, compared with participants who were retained for at least one assessment, had higher baseline suicidal ideation (mean=78.3 [SD=7.2] compared with mean=65.5 [SD=22.7],  $t=3.11$ ,  $p=0.01$ )"

*Corrected:* “Participants who were lost to follow-up, compared with participants who were retained for at least one assessment, had higher baseline suicidal ideation (mean=63.3 [SD=7.2] compared with mean=50.5 [SD=22.7],  $t=3.11$ ,  $p=0.01$ )”

3) Supplemental Data - Table 1. Demographic and Baseline Clinical Characteristics (N=66)

*Reported*

|        | TAU Condition<br>(N=32) |      | ASAP+TAU Condition<br>(N=34) |      | P value |
|--------|-------------------------|------|------------------------------|------|---------|
|        | Mean                    | SD   | Mean                         | SD   |         |
| SIQ-Jr | 67.0                    | 24.9 | 66.3                         | 19.2 | 0.89    |

*Corrected*

|        | TAU Condition<br>(N=32) |      | ASAP+TAU Condition<br>(N=34) |      | P value |
|--------|-------------------------|------|------------------------------|------|---------|
|        | Mean                    | SD   | Mean                         | SD   |         |
| SIQ-Jr | 52.0                    | 24.9 | 51.3                         | 19.2 | 0.89    |
