# Supplementary material for: As Safe as Possible (ASAP): A Brief App-Supported Inpatient Intervention to Prevent Postdischarge Suicidal Behavior in Hospitalized, Suicidal Adolescents
Source: Atypon-hosted journal article supplement (doi:10.1176/appi.ajp.2018.17101151), 2018-07-19
Supplement: appi.ajp.2018.17101151.ds001.pdf [file appi.ajp.2018.17101151.ds001.pdf]

As Safe As Possible (ASAP): Establishing efficacy of a manualized intervention and Associated  
Phone app for Psychiatrically hospitalized Suicidal Adolescents

**Supplemental Data**

**Table 1. Demographic and Baseline Clinical Characteristics (N=66)**

| Characteristics                         | TAU Condition<br>(N=32) |      | ASAP + TAU Condition<br>(N=34) |       |         |
|-----------------------------------------|-------------------------|------|--------------------------------|-------|---------|
|                                         | Mean                    | SD   | Mean                           | SD    | P value |
| Age (years)                             | 15.3                    | 1.4  | 14.9                           | 1.6   | 0.37    |
| Annual Income Bracket                   | 3.1                     | 1.5  | 3.7                            | 1.4   | 0.136   |
| PHQ-9                                   | 17.5                    | 5.8  | 19.2                           | 4.8   | 0.22    |
| SCARED                                  | 46.4                    | 17.3 | 50.3                           | 13.7  | 0.31    |
| CRAFFT                                  | 1.5                     | 1.8  | 1.4                            | 1.6   | 0.94    |
| SIQ-Jr                                  | 67.0                    | 24.9 | 66.3                           | 19.2  | 0.89    |
| FACES (Cohesion)                        | 24.1                    | 5.4  | 22.8                           | 5.5   | 0.36    |
| FACES (Flexibility)                     | 21.5                    | 4.7  | 20.2                           | 5.8   | 0.33    |
| FACES (Communication)                   | 32.4                    | 8.1  | 31.4                           | 7.6   | 0.60    |
| FACES (Satisfaction)                    | 26.9                    | 6.3  | 25.7                           | 8.0   | 0.50    |
| Reasons for Living                      | 111.1                   | 40.4 | 112.2                          | 34.0  | 0.90    |
| Distress Tolerance                      | 3.7                     | 1.0  | 3.9                            | 0.8   | 0.46    |
| REQ (Internal Dysfunction)              | 3.4                     | 0.9  | 3.4                            | 0.7   | 0.98    |
| REQ (External Dysfunction)              | 1.9                     | 0.9  | 1.8                            | 0.7   | 0.39    |
| REQ (Internal Functional)               | 3.0                     | 0.7  | 2.9                            | 0.9   | 0.55    |
| REQ (External Functional)               | 3.0                     | 0.7  | 2.8                            | 0.7   | 0.31    |
| PSQI                                    | 10.1                    | 3.6  | 12.4                           | 3.7   | 0.02    |
| Weeks Hospitalized                      | 2.3                     | 2.3  | 2.1                            | 2.3   | 0.48    |
|                                         | N                       | %    | N                              | %     | P value |
| Sex                                     |                         |      |                                |       |         |
| Female                                  | 29                      | 90.6 | 30                             | 88.2  | >.99    |
| Race/Ethnicity                          |                         |      |                                |       |         |
| Caucasian                               | 24                      | 75.0 | 27                             | 79.4  | 0.77    |
| Hispanic                                | 0                       | 0.0  | 1                              | 2.9   | >.99    |
| Living with Both Parents                | 11                      | 35.5 | 13                             | 38.2  | 0.82    |
| Study Site                              |                         |      |                                |       |         |
| Pittsburgh                              | 13                      | 40.6 | 16                             | 47.1  | 0.60    |
| Physical/Sexual Abuse                   | 12                      | 40.0 | 14                             | 41.2  | 0.92    |
| Alcohol/Substance Use (CRAFFT $\geq$ 2) | 10                      | 31.3 | 8                              | 23.5  | 0.48    |
| Lifetime Suicidality                    |                         |      |                                |       |         |
| Morbid thoughts/death wishes            | 31                      | 96.9 | 34                             | 100.0 | 0.49    |
| Suicidal ideation without plan          | 30                      | 96.8 | 33                             | 97.1  | >.99    |

|                                            |    |      |    |       |      |
|--------------------------------------------|----|------|----|-------|------|
| Suicidal ideation with plan & intent       | 28 | 90.3 | 31 | 91.2  | >.99 |
| Any suicidal ideation                      | 31 | 96.9 | 34 | 100.0 | 0.49 |
| SRB <sup>‡</sup>                           | 22 | 68.8 | 17 | 50.0  | 0.12 |
| Suicide attempt                            | 25 | 78.1 | 28 | 82.4  | 0.67 |
| Suicide attempt/ SRB <sup>‡</sup>          | 30 | 93.8 | 31 | 91.2  | >.99 |
| NSSI                                       | 29 | 90.6 | 28 | 82.4  | 0.48 |
| Psychiatric Disorders (YSR)                |    |      |    |       |      |
| Affective Disorders                        | 26 | 81.3 | 29 | 85.3  | 0.66 |
| Anxiety                                    | 17 | 53.1 | 19 | 55.9  | 0.82 |
| Somatic Problems                           | 6  | 18.8 | 11 | 32.4  | 0.21 |
| ADHD                                       | 4  | 12.5 | 4  | 11.8  | >.99 |
| ODD                                        | 5  | 15.6 | 4  | 11.8  | 0.73 |
| Conduct                                    | 6  | 18.8 | 5  | 14.7  | 0.66 |
| Psychiatric Disorders (Clinical Diagnosis) |    |      |    |       |      |
| Depression                                 | 26 | 81.2 | 31 | 91.2  | 0.30 |
| Bipolar                                    | 5  | 15.6 | 3  | 8.8   | 0.47 |
| Anxiety                                    | 18 | 56.2 | 20 | 58.8  | 0.83 |
| ADHD                                       | 4  | 12.5 | 9  | 26.5  | 0.15 |
| Conduct                                    | 0  | 0.0  | 0  | 0.0   | -    |
| ODD                                        | 0  | 0.0  | 0  | 0.0   | -    |
| Other                                      | 7  | 21.9 | 5  | 14.7  | 0.45 |

\* 1=Less than \$24,999; 2=\$25,000-\$49,999; 3=\$50,000-\$74,999; 4=\$75,000-\$99,999; 5=More than \$100,000

<sup>‡</sup>SRB: interrupted or aborted

PHQ9: Patient Health Questionnaire, Depression Scale. SIQ: Suicidal Ideation Questionnaire. REQ: Regulation of Emotions Questionnaire. PSQI: Pittsburgh Sleep Quality Index. YSR: Youth Self Report.

**Table 2. Medication use – Lifetime at baseline interview (covers from 12-months prior to interview)**

|                                       | Usual Care<br>(n=32) | Treatment<br>(n=34) | Total<br>(n=66) | Test          | df | P     |
|---------------------------------------|----------------------|---------------------|-----------------|---------------|----|-------|
| Antidepressants, N(% Yes)             | 26 (81.2)            | 31 (91.2)           | 57 (86.4)       | FET           | -  | 0.30  |
| Antipsychotics, N(%)                  | 7 (21.9)             | 6 (17.6)            | 13 (19.7)       | $\chi^2=0.19$ | 1  | 0.67  |
| Antianxiety, N(%)                     | 7 (21.9)             | 6 (17.6)            | 13 (19.7)       | $\chi^2=0.19$ | 1  | 0.67  |
| Hypnotic, benzo or barbiturates, N(%) | 1 (3.1)              | 2 (5.9)             | 3 (4.5)         | FET           | -  | >0.99 |
| Other sleep aids, N(%)                | 4 (12.5)             | 12 (35.3)           | 16 (24.2)       | $\chi^2=4.66$ | 1  | 0.03  |
| Any sleep aid, N(%)                   | 5 (15.6)             | 14 (41.2)           | 19 (28.8)       | $\chi^2=5.25$ | 1  | 0.02  |
| Mood Stabilizers, N(%)                | 4 (12.5)             | 1 (2.9)             | 5 (7.6)         | FET           | -  | 0.19  |
| Stimulants, N(%)                      | 5 (15.6)             | 9 (26.5)            | 14 (21.2)       | $\chi^2=1.16$ | 1  | 0.28  |
| Other Psychotropic Medication, N(%)   | 8 (25.0)             | 12 (35.3)           | 20 (30.3)       | $\chi^2=0.83$ | 1  | 0.36  |

|                        |           |           |           |     |   |      |
|------------------------|-----------|-----------|-----------|-----|---|------|
| Any of the above, N(%) | 28 (87.5) | 33 (97.1) | 61 (92.4) | FET | - | 0.19 |
|------------------------|-----------|-----------|-----------|-----|---|------|

**Table 3. Medication use – Lifetime at baseline interview (covers from 12-months prior to interview) by Site**

|                                       | Pittsburgh<br>(n=29) | Dallas<br>(n=37) | Total<br>(n=66) | Test           | df | P     |
|---------------------------------------|----------------------|------------------|-----------------|----------------|----|-------|
| Antidepressants, N(% Yes)             | 25 (86.2)            | 32 (86.5)        | 57 (86.4)       | FET            | -  | >0.99 |
| Antipsychotics, N(%)                  | 11 (37.9)            | 2 (5.4)          | 13 (19.7)       | $\chi^2=10.87$ | 1  | 0.001 |
| Antianxiety, N(%)                     | 4 (13.8)             | 9 (24.3)         | 13 (19.7)       | $\chi^2=1.14$  | 1  | 0.29  |
| Hypnotic, benzo or barbiturates, N(%) | 0 (0.0)              | 3 (8.1)          | 3 (4.5)         | FET            | -  | 0.25  |
| Other sleep aids, N(%)                | 5 (17.2)             | 11 (29.7)        | 16 (24.2)       | $\chi^2=1.38$  | 1  | 0.24  |
| Any sleep aid, N(%)                   | 5 (17.2)             | 14 (37.8)        | 19 (28.8)       | $\chi^2=3.36$  | 1  | 0.07  |
| Mood Stabilizers, N(%)                | 3 (10.3)             | 2 (5.4)          | 5 (7.6)         | FET            | -  | 0.65  |
| Stimulants, N(%)                      | 7 (24.1)             | 7 (18.9)         | 14 (21.2)       | $\chi^2=0.27$  | 1  | 0.61  |
| Other Psychotropic Medication, N(%)   | 9 (31.0)             | 11 (29.7)        | 20 (30.3)       | $\chi^2=0.01$  | 1  | 0.91  |
| Any of the above, N(%)                | 27 (93.1)            | 34 (91.9)        | 61 (92.4)       | FET            | -  | >0.99 |

**Table 4. Medication use – Lifetime before discharge – Participants with follow-up data only**

|                                       | Usual<br>Care<br>(n=29) | Treatment<br>(n=31) | Total<br>(n=60) | Test          | df | P     |
|---------------------------------------|-------------------------|---------------------|-----------------|---------------|----|-------|
| Antidepressants, N(% Yes)             | 24 (82.8)               | 30 (96.8)           | 54 (90.0)       | FET           | -  | 0.10  |
| Antipsychotics, N(%)                  | 8 (27.6)                | 6 (19.4)            | 14 (23.3)       | $\chi^2=0.57$ | 1  | 0.45  |
| Antianxiety, N(%)                     | 6 (20.7)                | 9 (29.0)            | 15 (25.0)       | $\chi^2=0.56$ | 1  | 0.46  |
| Hypnotic, benzo or barbiturates, N(%) | 1 (3.4)                 | 2 (6.5)             | 3 (5.0)         | FET           | -  | >0.99 |
| Other sleep aids, N(%)                | 8 (27.6)                | 16 (51.6)           | 24 (40.0)       | $\chi^2=3.60$ | 1  | 0.06  |
| Any sleep aid, N(%)                   | 9 (31.0)                | 18 (58.1)           | 27 (45.0)       | $\chi^2=4.42$ | 1  | 0.04  |
| Mood Stabilizers, N(%)                | 3 (10.3)                | 1 (3.2)             | 4 (6.7)         | FET           | -  | 0.35  |
| Stimulants, N(%)                      | 5 (17.2)                | 10 (32.3)           | 15 (25.0)       | $\chi^2=1.80$ | 1  | 0.18  |
| Other Psychotropic Medication, N(%)   | 10 (34.5)               | 13 (41.9)           | 23 (38.3)       | $\chi^2=0.35$ | 1  | 0.55  |
| Any of the above, N(%)                | 26 (89.7)               | 31 (100.0)          | 57 (95.0)       | FET           | -  | 0.11  |

**Table 5. Medication use – Lifetime after discharge – Participants with follow-up data only  
One participant does not contribute because still in hospital**

|                                       | Usual<br>Care<br>(n=29) | Treatment<br>(n=31) | Total<br>(n=59) | Test          | df | P    |
|---------------------------------------|-------------------------|---------------------|-----------------|---------------|----|------|
| Antidepressants, N(% Yes)             | 24 (82.8)               | 28 (93.3)           | 52 (88.1)       | FET           | -  | 0.25 |
| Antipsychotics, N(%)                  | 12 (41.4)               | 4 (13.3)            | 16 (27.1)       | $\chi^2=5.87$ | 1  | 0.02 |
| Antianxiety, N(%)                     | 9 (31.0)                | 15 (50.0)           | 24 (40.7)       | $\chi^2=2.20$ | 1  | 0.14 |
| Hypnotic, benzo or barbiturates, N(%) | 2 (6.9)                 | 5 (16.7)            | 7 (11.9)        | FET           | -  | 0.42 |
| Other sleep aids, N(%)                | 8 (27.6)                | 19 (63.3)           | 27 (45.8)       | $\chi^2=7.59$ | 1  | 0.01 |
| Any sleep aid, N(%)                   | 10 (34.5)               | 19 (63.3)           | 29 (49.2)       | $\chi^2=4.91$ | 1  | 0.03 |
| Mood Stabilizers, N(%)                | 7 (24.1)                | 8 (26.7)            | 15 (25.4)       | $\chi^2=0.05$ | 1  | 0.82 |
| Stimulants, N(%)                      | 5 (17.2)                | 11 (36.7)           | 16 (27.1)       | $\chi^2=2.82$ | 1  | 0.09 |
| Other Psychotropic Medication, N(%)   | 6 (20.7)                | 9 (30.0)            | 15 (25.4)       | $\chi^2=0.67$ | 1  | 0.41 |

|                        |           |            |           |     |   |      |
|------------------------|-----------|------------|-----------|-----|---|------|
| Any of the above, N(%) | 26 (89.7) | 31 (100.0) | 57 (95.0) | FET | - | 0.11 |
|------------------------|-----------|------------|-----------|-----|---|------|
